# Supplementary material for: Development of Salt- and Gastric-Resistant Whey Protein Isolate Stabilized Emulsions in the Presence of Cinnamaldehyde and Application in Salad Dressing
Source: MDPI journal article supplement (doi:10.3390/foods10081868), 2021-08-12

## **Supplementary material**

**Figure S1.** Effect of ion type and concentration on the zeta-potential of WPI solutions.

**Figure S2.** Appearance of M100C0 and M70C30 emulsions during digestion in the presence of different ions.

**Figure S1**

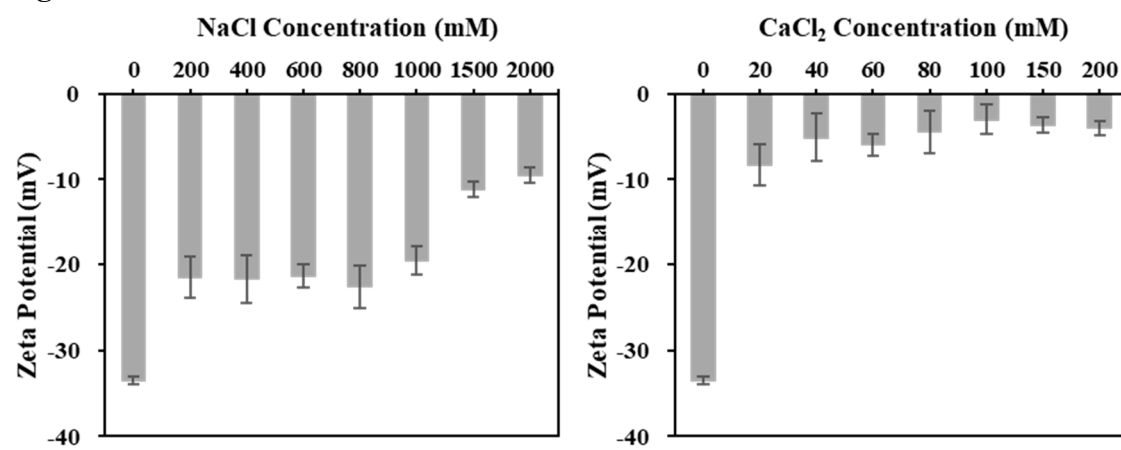

Figure S2

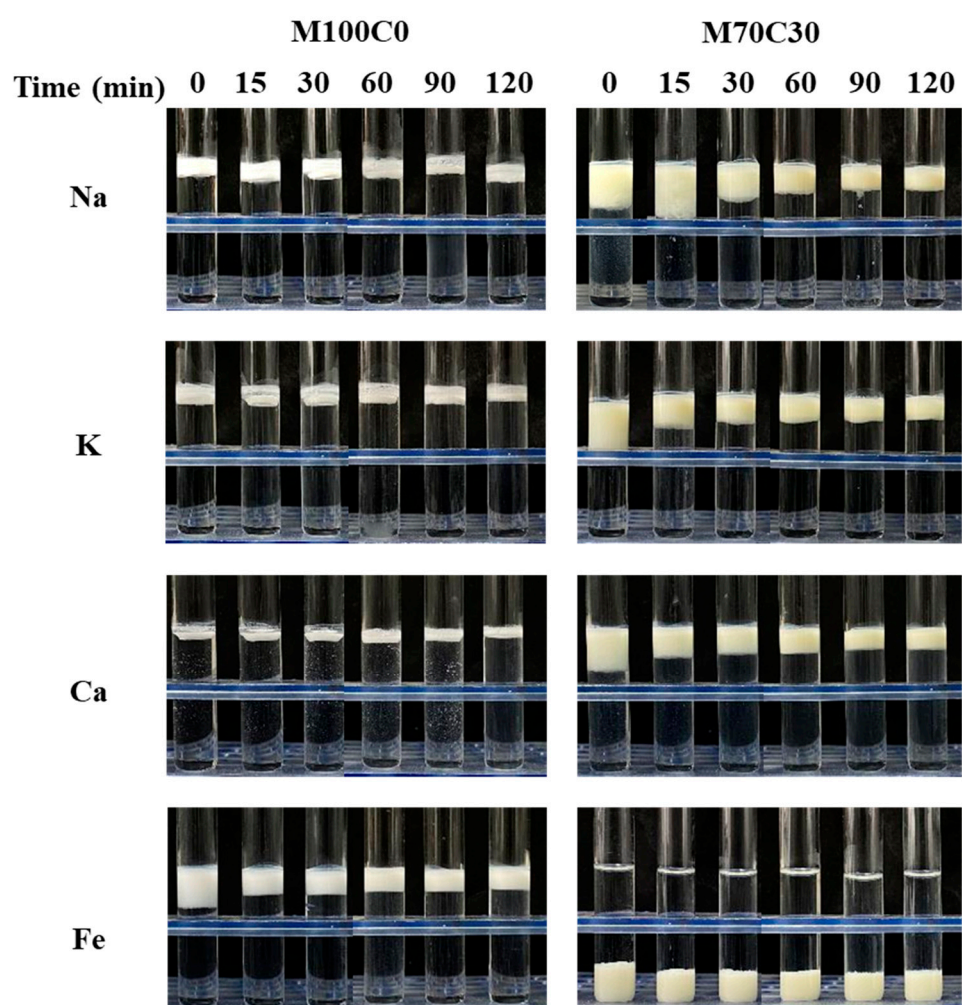

Supplement: s1 [file s1]
